# Supplementary material for: Synergistically coupling Pt with Ni towards accelerated water dissociation for enhanced alkaline hydrogen evolution
Source: Royal Society of Chemistry journal article supplement (doi:10.1039/d2ta03108f), 2022-01-01
Supplement: d2ta03108f1.pdf [file d2ta03108f1.pdf]

## Electronic Supplementary Information for

# Synergistically coupling Pt with Ni toward accelerated water dissociation for enhanced alkaline hydrogen evolution†

Jiangnan Guo,<sup>‡</sup> Jinlong Liu,<sup>‡\*</sup> Xinxin Zhang, Xiyuan Guan, Muhong Zeng, Jiarong Shen, Jianing Zou, Qiuzhu Chen, Tian Wang, and Dong Qian\*

College of Chemistry and Chemical Engineering, Central South University, Changsha 410083, China

† These authors contributed equally to this work.

\* Corresponding authors. *E-mail addresses:* [liujinlong@csu.edu.cn](mailto:liujinlong@csu.edu.cn) (J. Liu), [qiandong6@vip.sina.com](mailto:qiandong6@vip.sina.com) (D. Qian).

## 1. Experimental Section

### 1.1 Syntheses of Materials

Hydrochloric acid (HCl, 37%), ethanol, potassium hydroxide (KOH), aniline (99.5%), nickel(II) nitrate hexahydrate ( $\text{NiCl}_2 \cdot 6\text{H}_2\text{O}$ , 99.995%), chloroplatinic acid hexahydrate ( $\text{H}_2\text{PtCl}_6 \cdot 6\text{H}_2\text{O}$ , Pt  $\geq$ 37.5%), and ammonium persulfate (APS,  $(\text{NH}_4)_2\text{S}_2\text{O}_8$ , 99.99%) were purchased from Aladdin. While Pt/C (20 wt% of Pt on Vulcan XC72) and Nafion (5 wt%) were obtained from the Fuel Cell Store. All the chemical reagents used in this work were analytical grade, and they were utilized directly without any purification. In a typical synthesis procedure of PtNi-NC-900, 9 mL of concentrated hydrochloric acid was added to 14 mL of deionized water, which was stirred to cool down naturally to room temperature. Afterwards, 2 mL of aniline was added dropwise into the diluted hydrochloric acid solution to obtain mix solution A. Then, 2.5 g of APS was dissolved into 10 mL of deionized water, resulting in solution B. Both the solutions were cooled to 4 °C in a refrigerator. Next, the solutions A and B were mixed and maintained at 4 °C for 12 h, which undertook polymerization to form polyaniline. The obtained product was washed with deionized water to pH  $\approx$  7 and collected by vacuum filtration. 0.3 mmol  $\text{NiCl}_2 \cdot 6\text{H}_2\text{O}$  and 0.2 mmol  $\text{H}_2\text{PtCl}_6 \cdot 6\text{H}_2\text{O}$  were dissolved in 20 mL of deionized water under magnetic agitation for 15 min, and then the collected polyaniline was dispersed in the above solution by stirring for another 1 h. After aging for 2 h, the solution was frozen using liquid nitrogen, then dried by lyophilization. The collected solid was transferred into a porcelain boat and heated ( $5\text{ }^\circ\text{C min}^{-1}$ ) to 900 °C under a  $\text{N}_2$  flow in a tube furnace, then annealed at 900 °C for 2 h, thereby giving the final product of PtNi-NC-900. For comparison, PtNi-NC-800 and PtNi-NC-1000 were also prepared by the similar procedures through controlling the pyrolysis temperatures at 800 and 1000 °C, respectively. Meanwhile, Pt-NC-900 was synthesized by the same method with the absence of  $\text{NiCl}_2 \cdot 6\text{H}_2\text{O}$ , and NC-900 was prepared by direct pyrolysis of polyaniline at 900 °C for 2 h in  $\text{N}_2$  atmosphere.

## 1.2 Materials Characterizations

Scanning electron microscopy (SEM) images were taken on a Zeiss Sigma 300 field-scanning electron microscope (FE-SEM). Transmission electron microscope (TEM) images, high-resolution TEM (HRTEM) images, selected area electron diffraction (SAED), and elemental mappings were obtained on a Tecnai G2 60-300 HOLO transmission electron microscope (TEM) with an image corrector and an energy-dispersive X-ray spectroscopy detector. X-ray diffraction (XRD) patterns were collected on a X'Pert PRO MPD X-ray diffractometer with Cu  $\text{K}\alpha$  radiation.  $\text{N}_2$  adsorption-desorption isotherms were recorded on a Tristar 3000 surface area and pore analyzer. X-ray

photoelectron spectroscopy (XPS) data were obtained on a Thermo Scientific K-Alpha X-ray photoelectron spectrometer equipped with a monochromatic Al K $\alpha$  source.

### 1.3 Electrochemical Measurements

The electrochemical properties of obtained powdery catalysts were investigated in a standard three-electrode system by the rotating disk electrode (RDE) method on a CHI 760E electrochemical workstation. Firstly, the as-prepared sample was dispersed in a mixed solution consisting of deionized water, ethanol, and 5 wt% Nafion by a volume ratio of 10:9:1 under sonication for 1 h. 10  $\mu$ L of the catalyst ink (4.0 mg mL<sup>-1</sup>) was then transferred onto a glassy carbon RDE (diameter = 5 mm, Pine Research Instrumentation), which was dried naturally in the air to serve as the working electrode. A carbon rod, a Hg/HgO electrode, and 1.0 M KOH aqueous solution were employed as the counter electrode, reference electrode, and electrolyte, respectively. During the electrochemical testing, the working electrode was rotated at 1600 rpm and a flow of N<sub>2</sub> was maintained to remove H<sub>2</sub> bubbles formed on the RDE surface. All potentials were referenced to a reversible hydrogen electrode by adding a value of (0.098 + 0.0592 $\times$ pH), and all polarization curves were calibrated by considering the *iR* contribution within the cell.

### 1.4 Computation Methods

The spin-polarized density functional theory (DFT) calculations were carried out using the Vienna Ab initio Simulation Package (VASP) software.<sup>1, 2</sup> To be specific, PtNi<sub>3</sub>(111) and Pt(111) slab models were built based on the HRTEM results and element content analysis, representing the catalytic surfaces of PtNi-NC-900 and commercial Pt/C catalysts, respectively. According to the experimentally observed Tafel slope values of PtNi-NC-900 and 20% Pt/C, it can be inferred that the alkaline HER processes on PtNi<sub>3</sub>(111) and Pt(111) surfaces are much more likely to follow the Volmer-Heyrovsky mechanism that generally involves four steps, namely, the adsorption of water molecule on the active site to form \*H<sub>2</sub>O, the dissociation of \*H<sub>2</sub>O to generate \*H and \*OH, the subsequent desorption of \*OH, and the final desorption of \*H to release gaseous H<sub>2</sub>.<sup>3, 4</sup> All computations were performed using the projected augmented wave (PAW) method and Perdew-Burke-Ernzerhof (PBE) exchange-correction functional to describe the core electrons and the electron interactions, respectively, under the generalized gradient approximation (GGA) with a plane-wave cut-off energy of 600 eV.<sup>5-7</sup> Dispersion correction was also considered in Grimme's scheme using DFT-D3 method.<sup>8</sup> For the geometry optimization, the top two layers of atoms were relaxed completely, whilst the bottom two layers of atoms were fixed. A  $\Gamma$ -point-centered

Monkhorst-Pack k-point grid of  $4 \times 4 \times 1$  was adopted to sample the Brillouin zone. The energy and force convergence thresholds were set to be  $1 \times 10^{-5}$  eV and  $0.02$  eV  $\text{\AA}^{-1}$ , respectively. For the calculations of density of states, the k-point grid was increased to  $12 \times 12 \times 1$ . A vacuum space of  $15$   $\text{\AA}$  was created in the  $c$  direction to avoid interactions between mirror images.

Under alkaline conditions (e.g.,  $1.0$  M KOH,  $\text{pH} = 14$ ), the HER via the Volmer-Heyrovsky mechanism involves the following steps:<sup>3,4</sup>

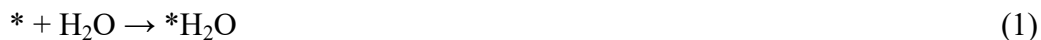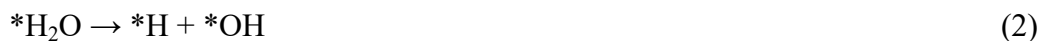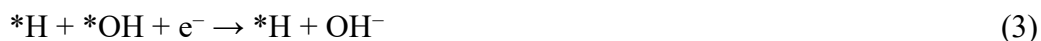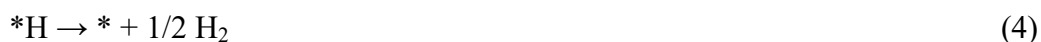

To calculate the free energy diagrams, the concept of computational hydrogen electrode proposed by Nørskov et al. was adopted, that is, the chemical potential of the  $(\text{H}^+ + e^-)$  couple equals to  $1/2 \text{H}_2$  at  $\text{pH} = 0$  in the electrolyte and  $1$  bar of  $\text{H}_2$  in the gas at  $298.15$  K.<sup>9</sup> Therefore, the reaction free energy of each elementary step above can be calculated by the following equation:

$$\Delta G = \Delta E + \Delta ZPE - T\Delta S + \Delta G_{\text{pH}} \quad (5)$$

where  $\Delta E$  is the electronic energy difference directly available from the DFT computation,  $\Delta ZPE$  is the correction in zero-point energies ( $ZPE$ ),  $T$  is the room temperature (here  $T = 298.15$  K),  $\Delta S$  is the entropy change,  $\Delta G_{\text{pH}}$  is the correction for the  $\text{H}^+$  free energy associated with the  $\text{pH}$  value (i.e.,  $\Delta G_{\text{pH}} = k_{\text{B}}T \times \ln 10 \times \text{pH}$ ,  $k_{\text{B}}$  is the Boltzmann constant). Both  $\Delta ZPE$  and  $\Delta S$  can be obtained from the vibration frequency analysis of the adsorbed species.

## 2. Supplementary Results

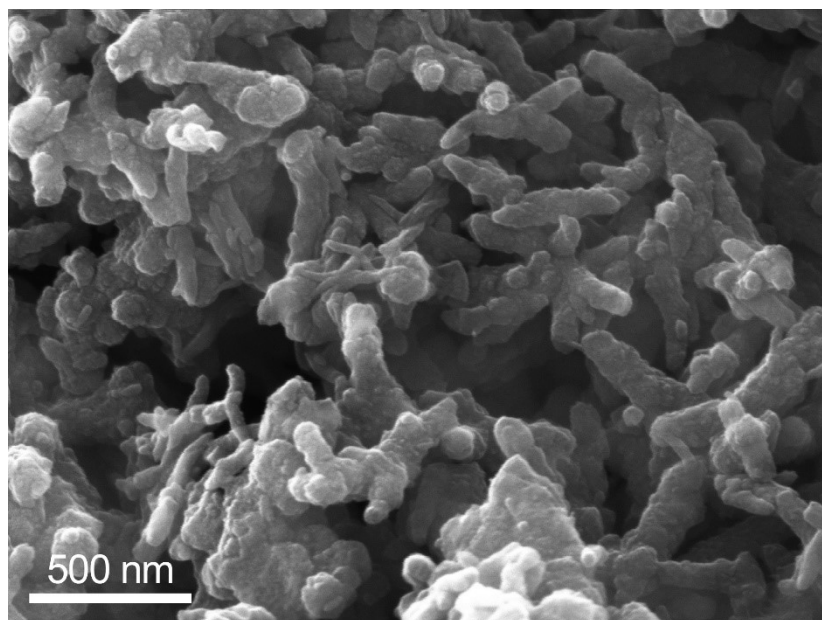

**Fig. S1** Representative SEM image of polyaniline.

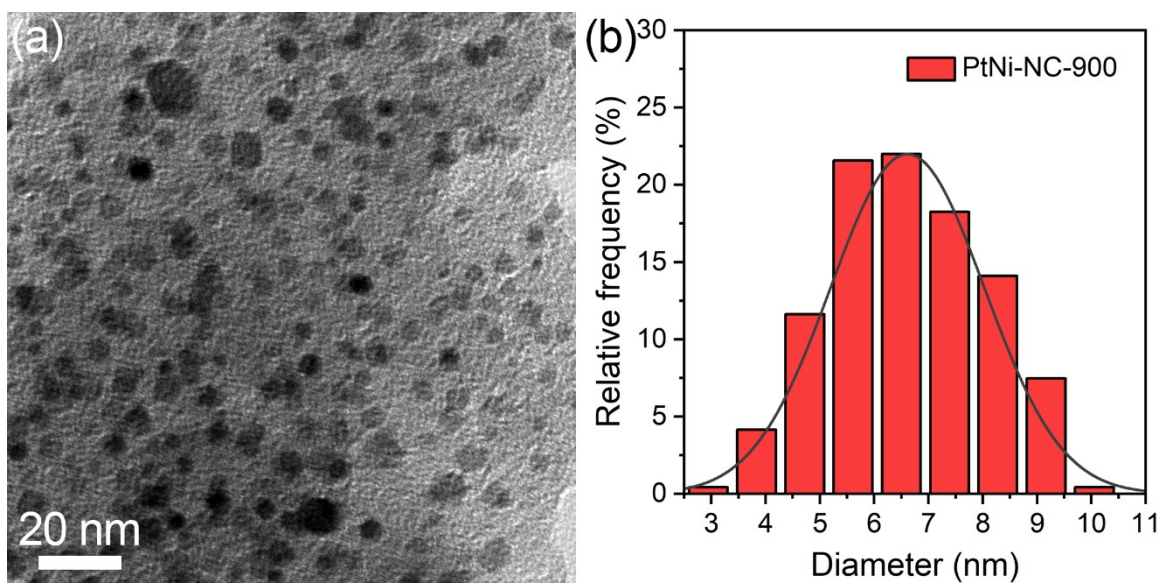

**Fig. S2** (a) TEM image and (b) corresponding PtNi nanoparticle size distribution of PtNi-NC-900.

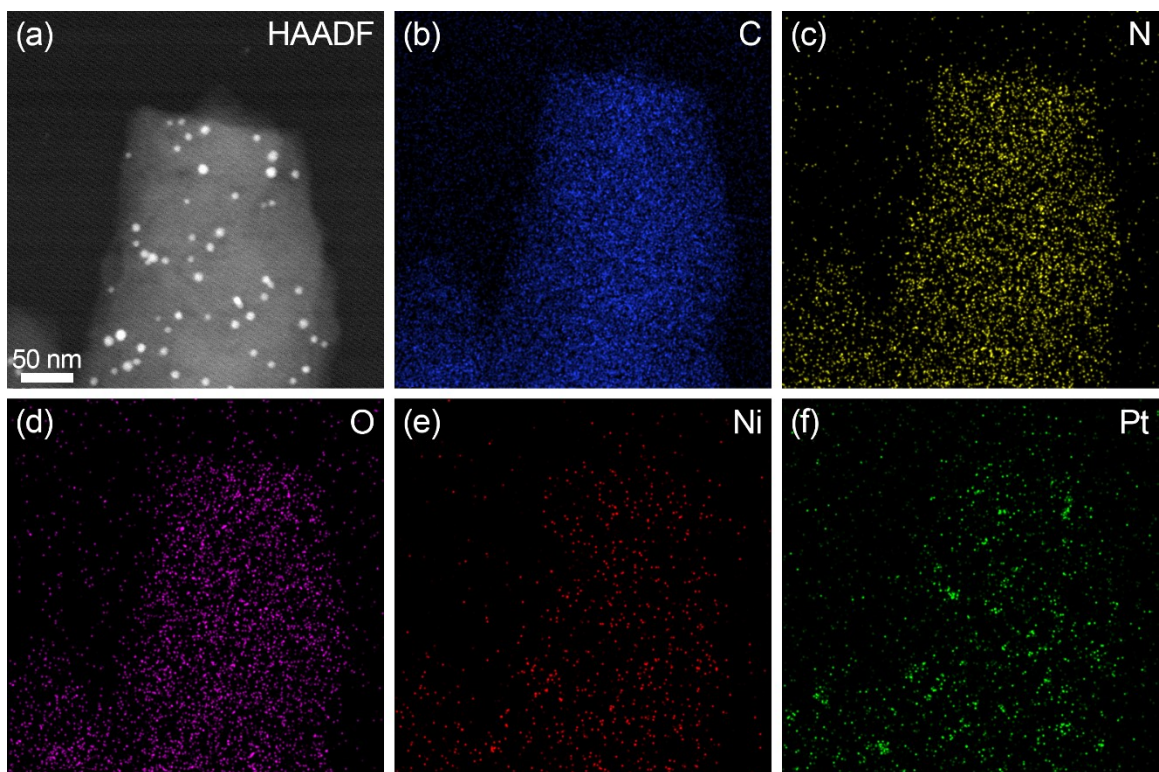

**Fig. S3** (a) HAADF image of PtNi-NC-900 and corresponding element mappings images for (b) C, (c) N, (d) O, (e) Ni, and (f) Pt.

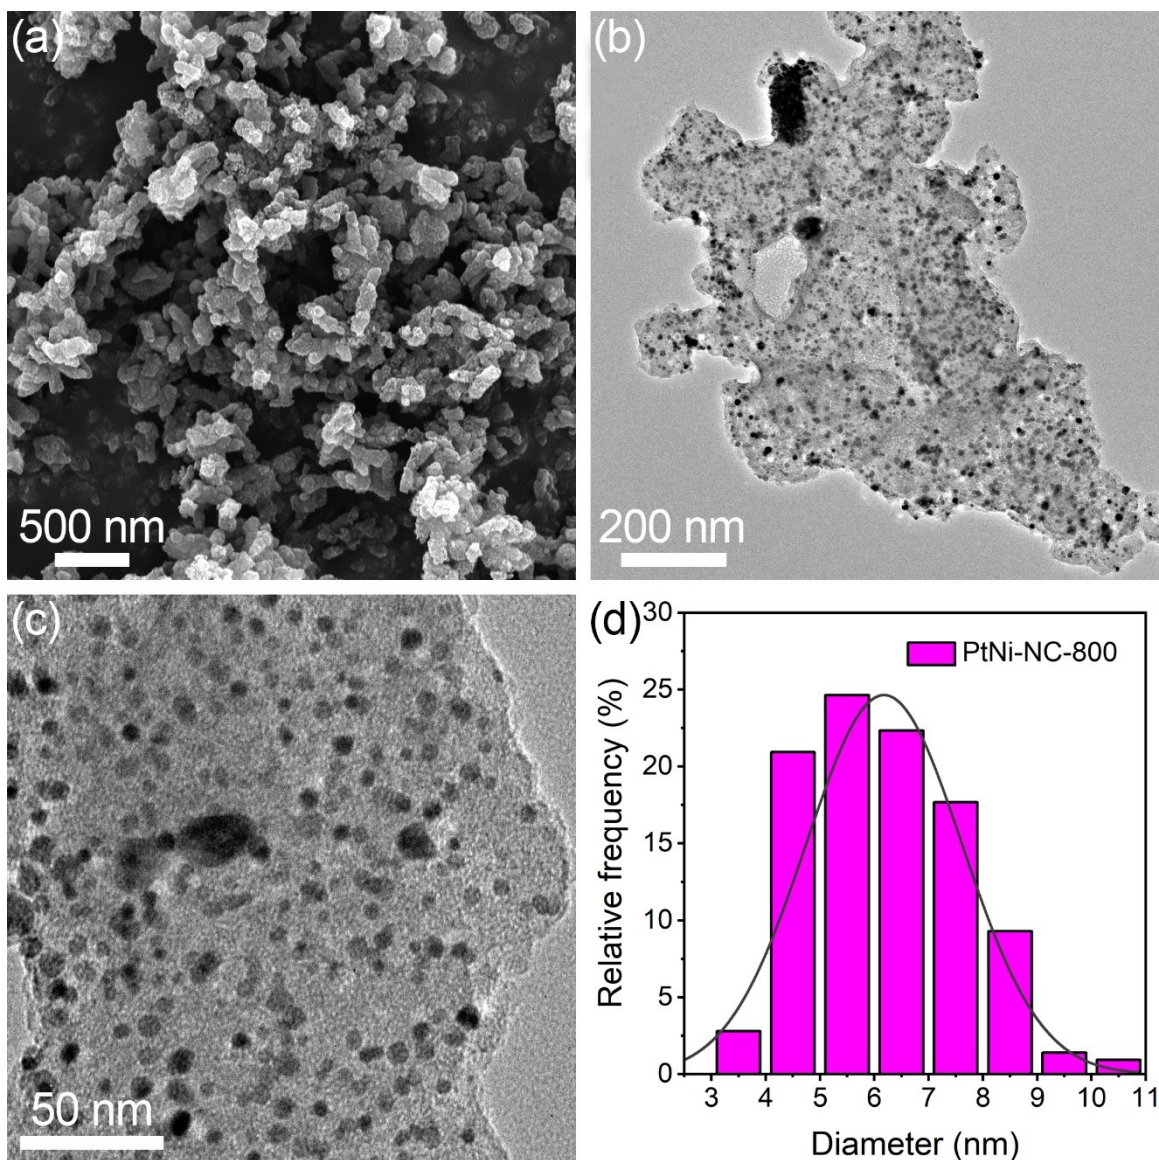

**Fig. S4** (a) SEM image, (b,c) TEM images, and (d) PtNi nanoparticle size distribution of PtNi-NC-800.

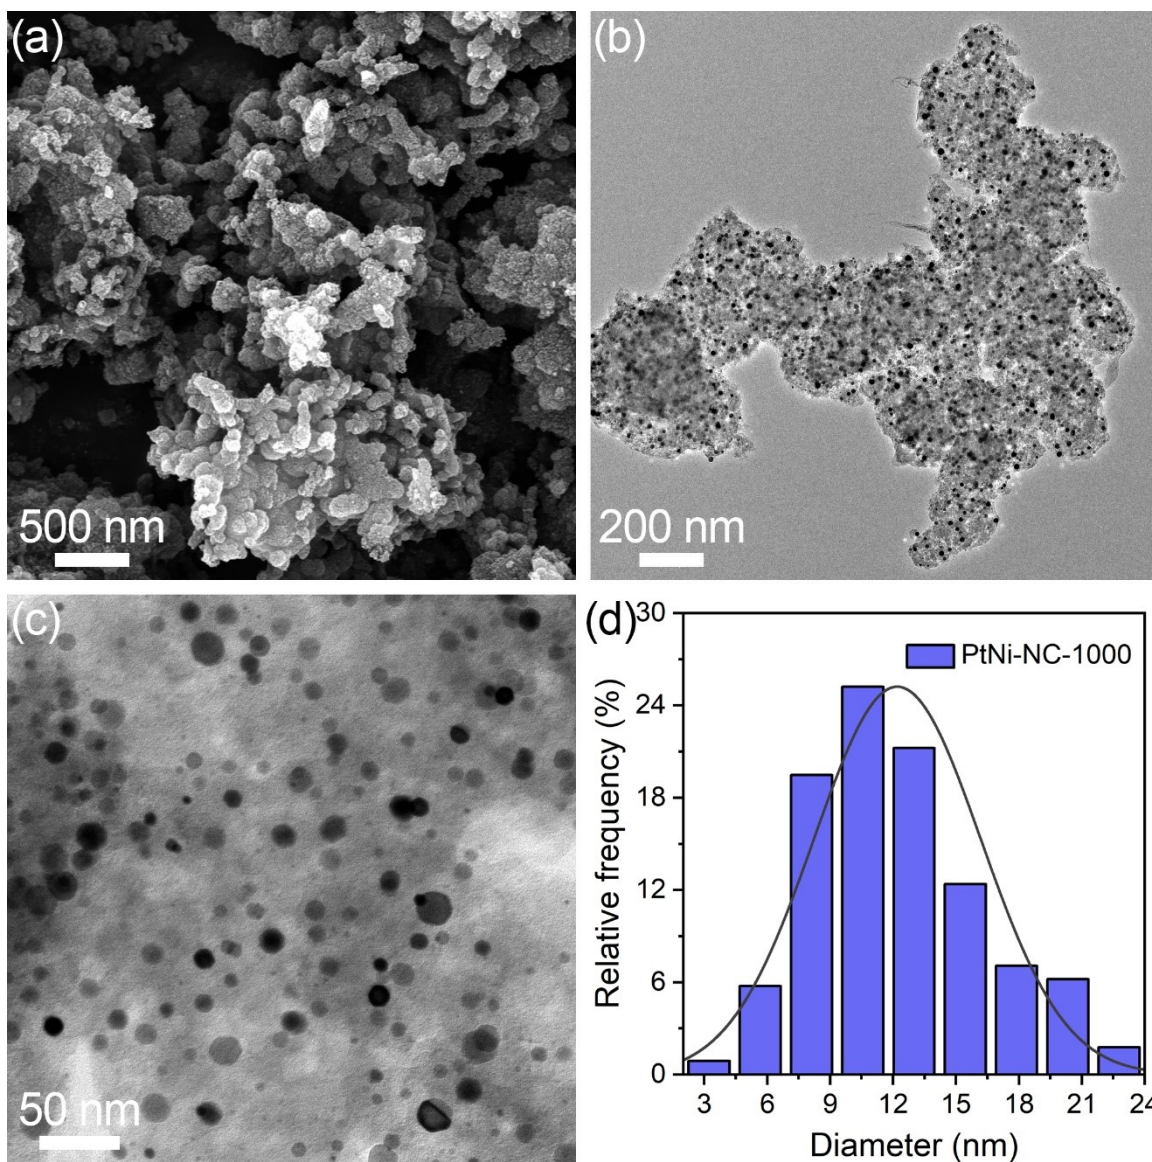

**Fig. S5** (a) SEM image, (b,c) TEM images, and (d) PtNi nanoparticle size distribution of PtNi-NC-1000.



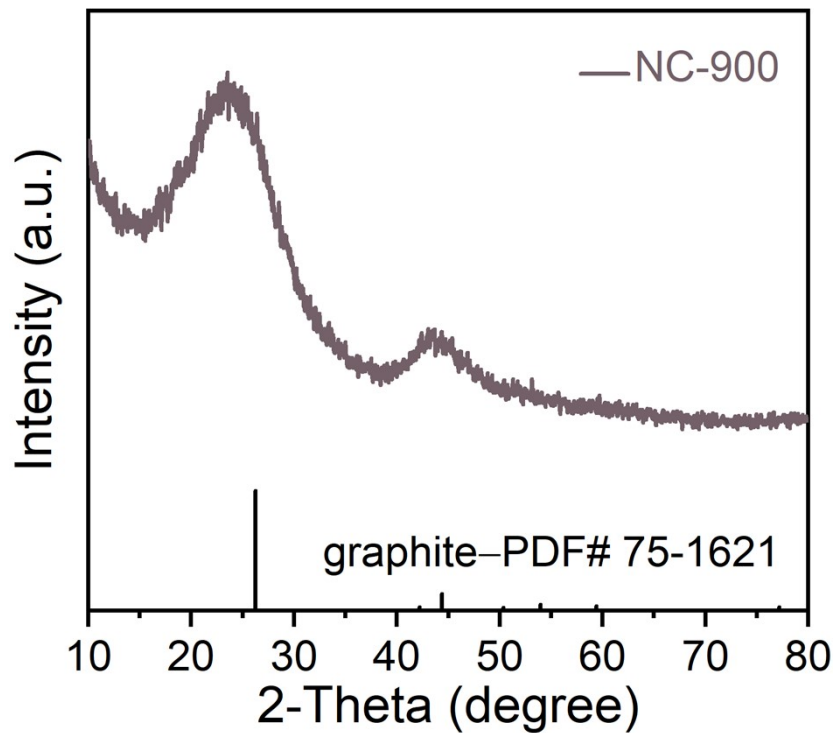

Fig. S6. XRD pattern of NC-900.

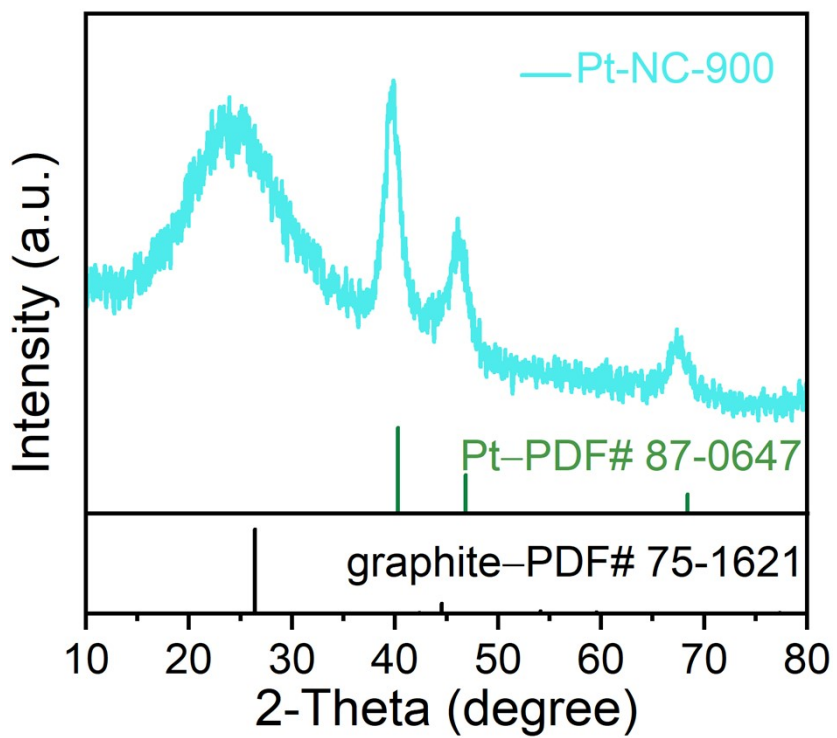

Fig. S7 XRD pattern of Pt-NC-900.

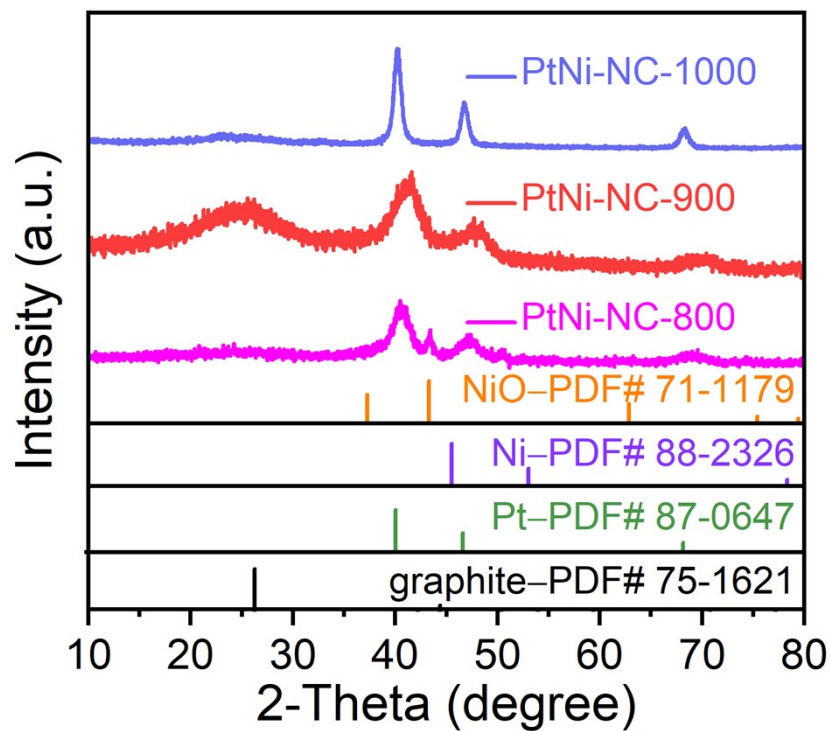

**Fig. S8** XRD patterns of PtNi-NC-800, PtNi-NC-900, and PtNi-NC-1000.

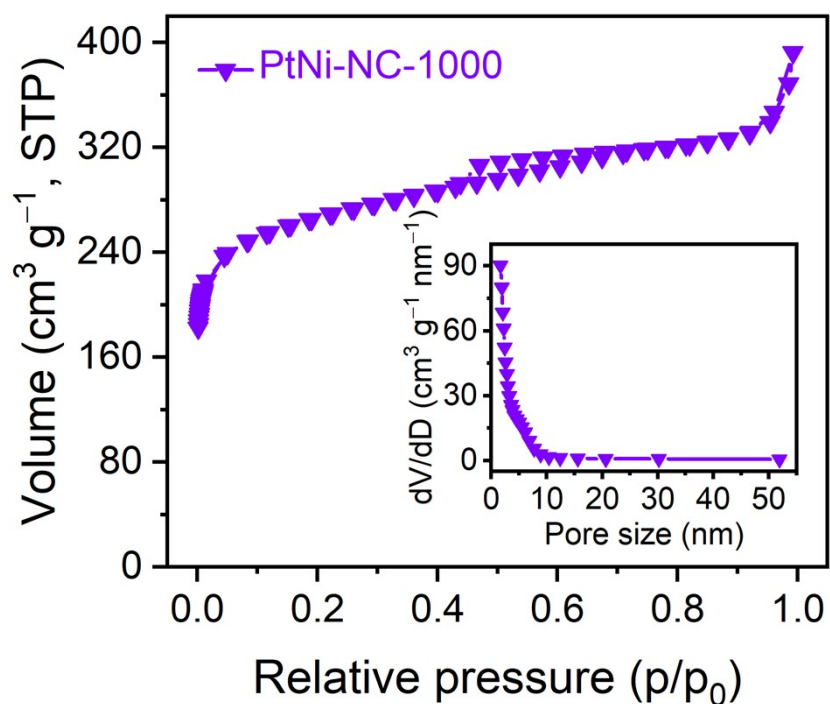

**Fig. S9** N<sub>2</sub> adsorption-desorption isotherm and corresponding pore size distribution of PtNi-NC-1000.

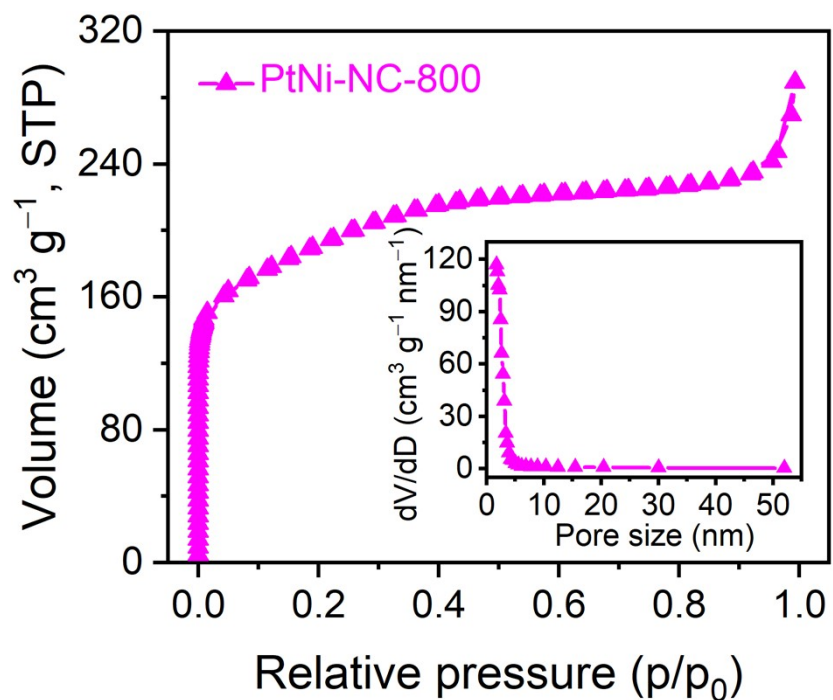

**Fig. S10** N<sub>2</sub> adsorption-desorption isotherm and corresponding pore size distribution of PtNi-NC-800.

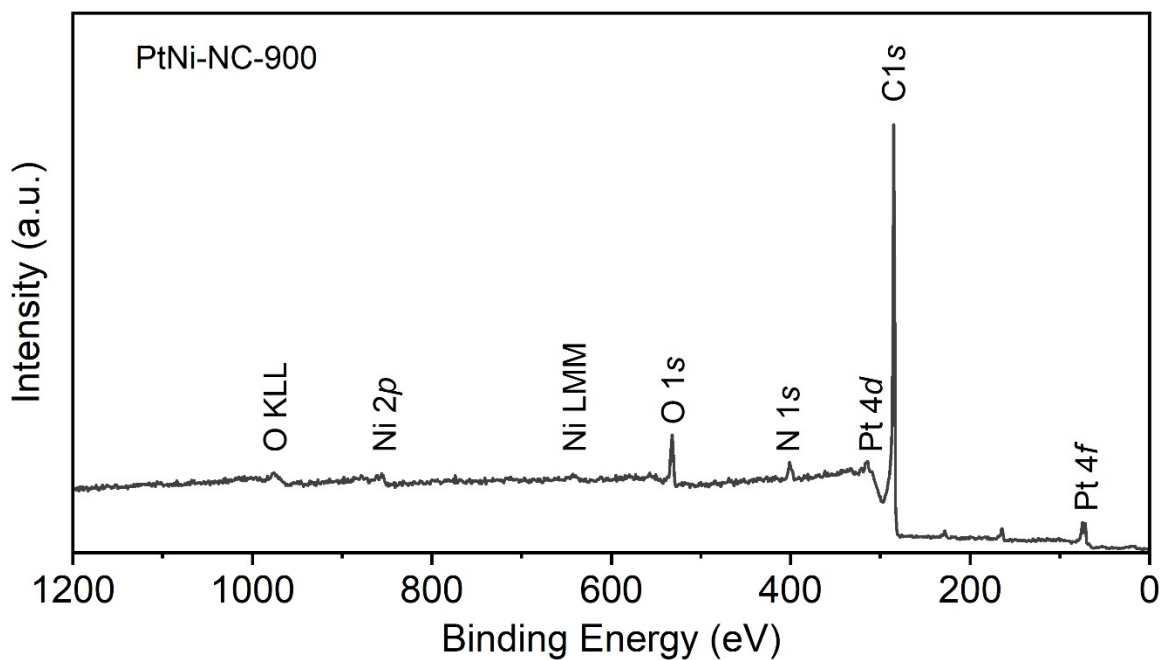

**Fig. S11** Survey XPS spectrum of PtNi-NC-900.

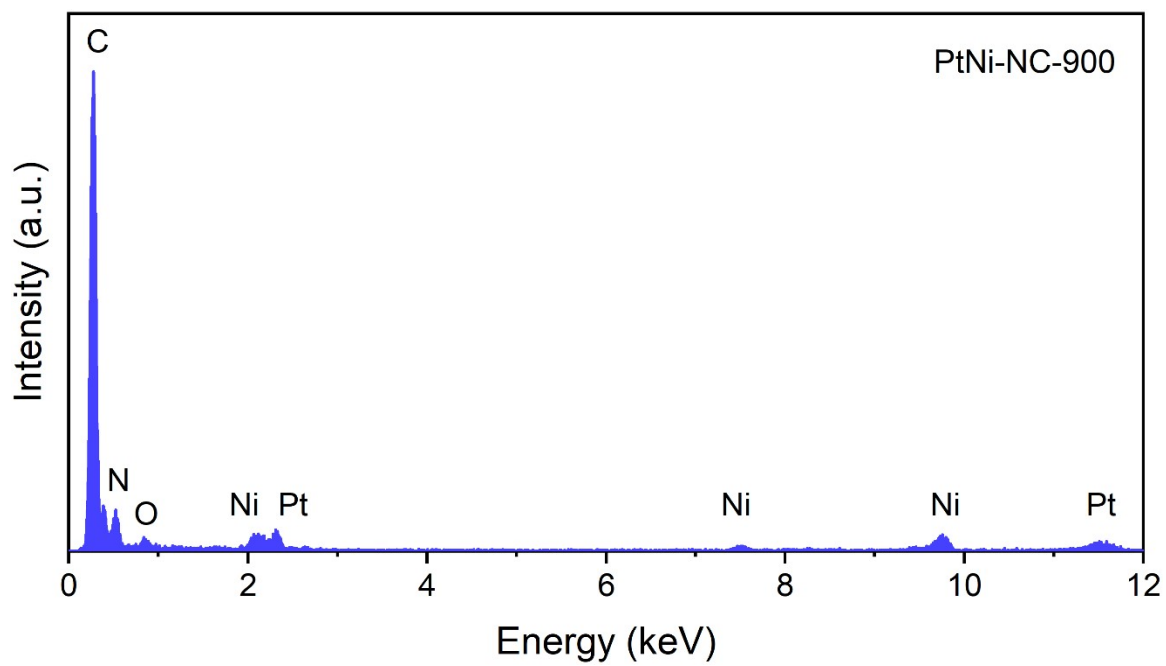

**Fig. S12** EDX spectrum of PtNi-NC-900.

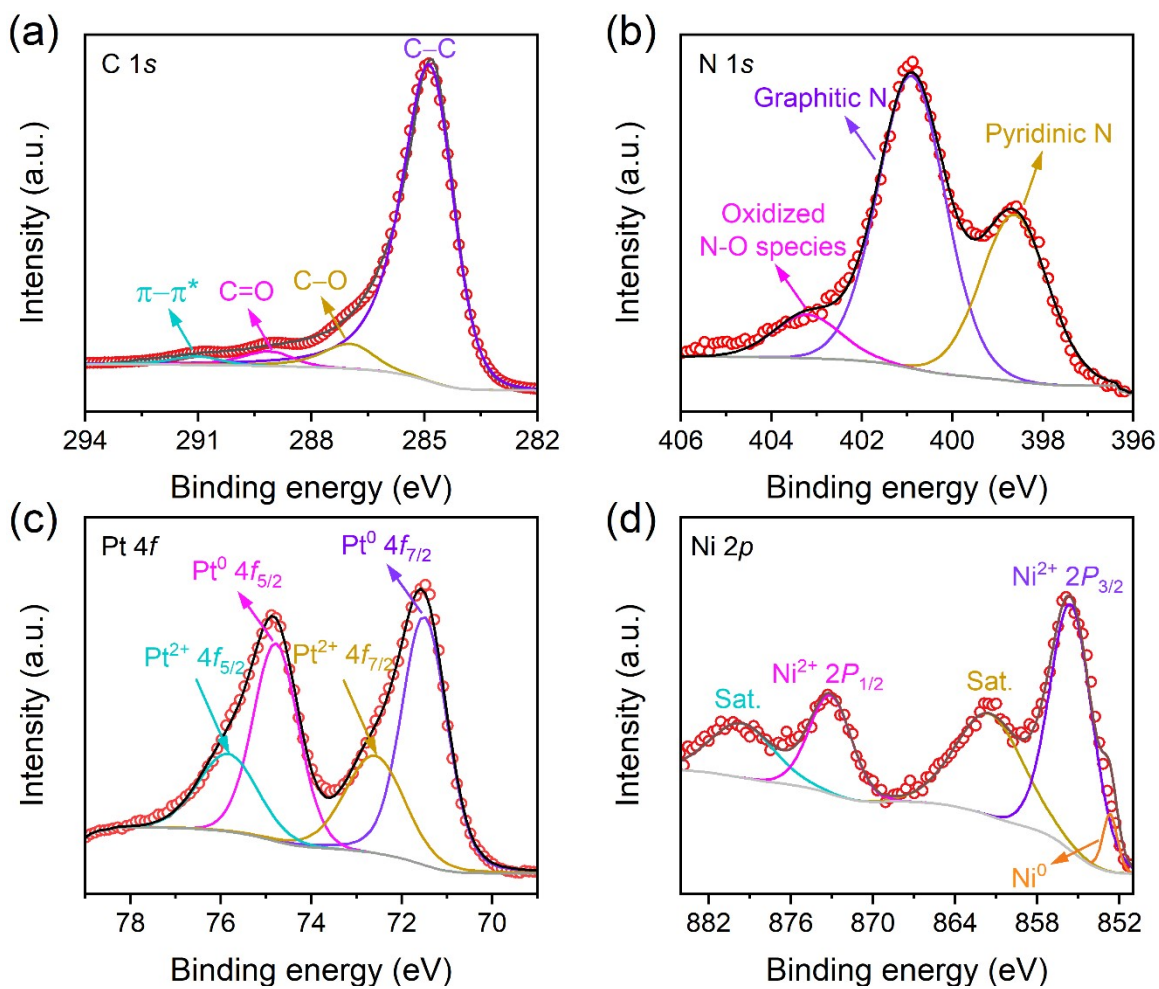

**Fig. S13** (a) C 1s, (b) N 1s, (c) Pt 4f, and (d) Ni 2p XPS spectra of PtNi-NC-800.

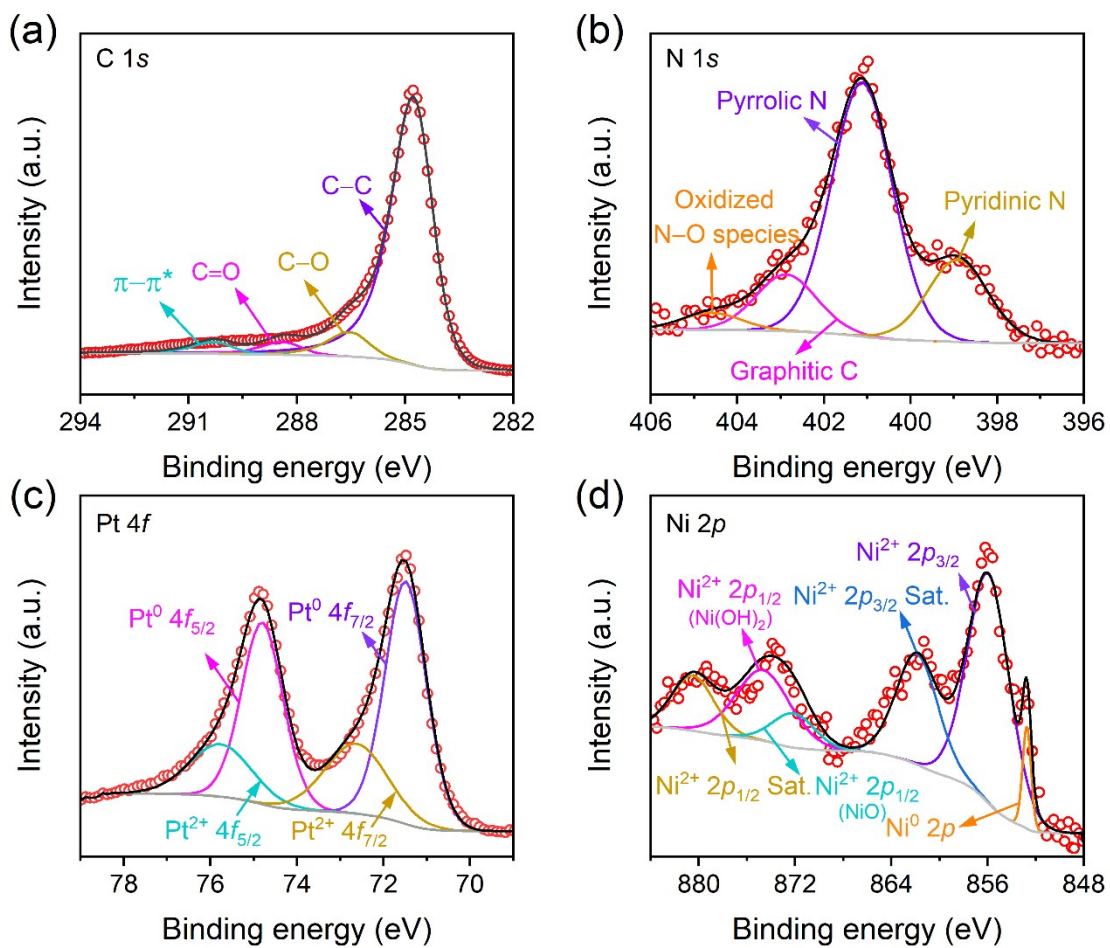

**Fig. S14** (a) C 1s, (b) N 1s, (c) Pt 4f, and (d) Ni 2p XPS spectra of PtNi-NC-1000.

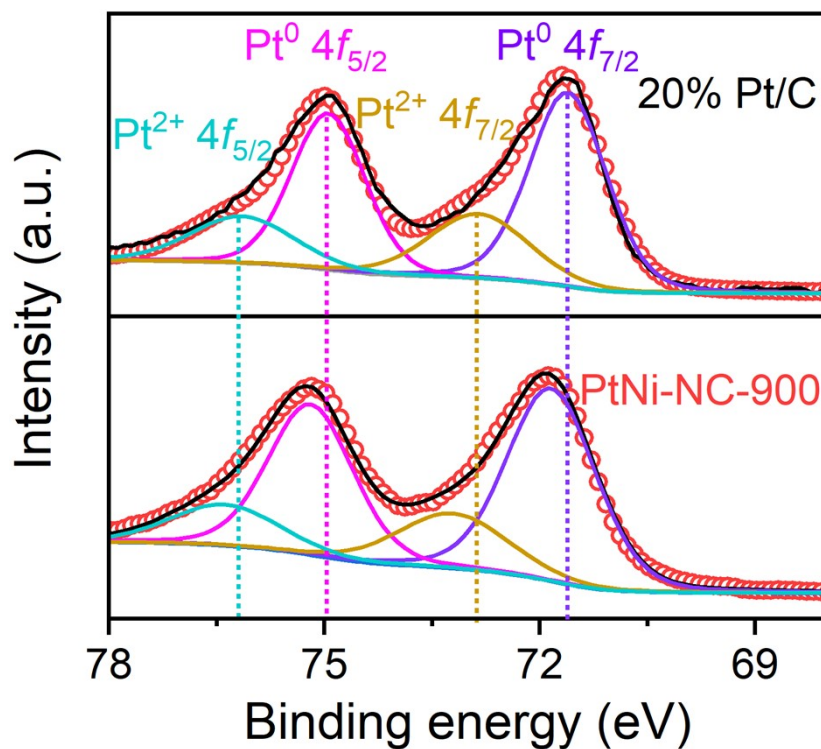

Fig. S15 Pt 4f XPS spectra of 20% Pt/C and PtNi-NC-900.

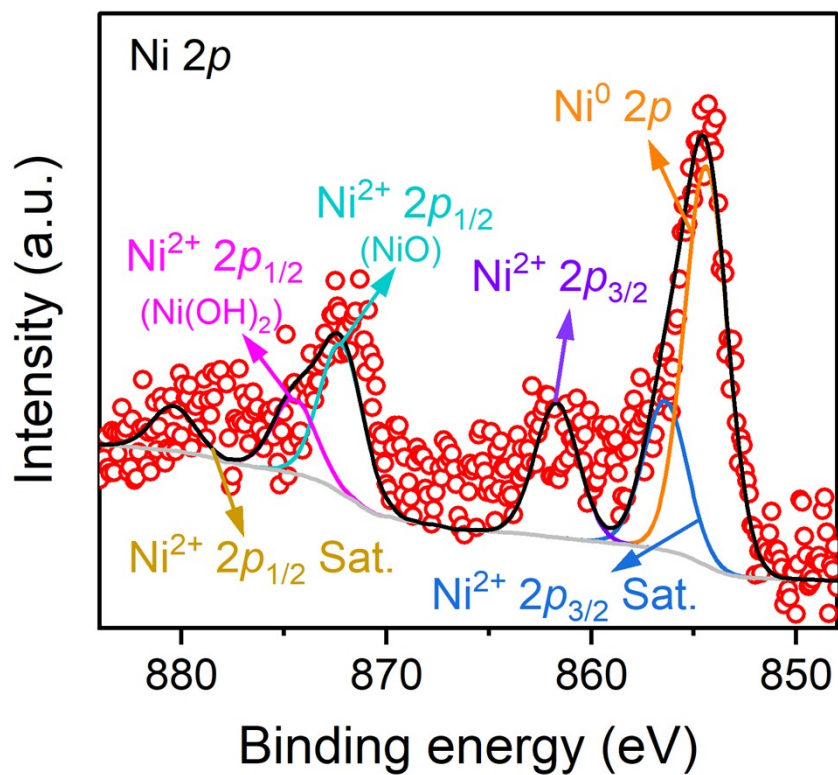

Fig. S16 Ni 2p XPS spectrum of Ni-NC-900.

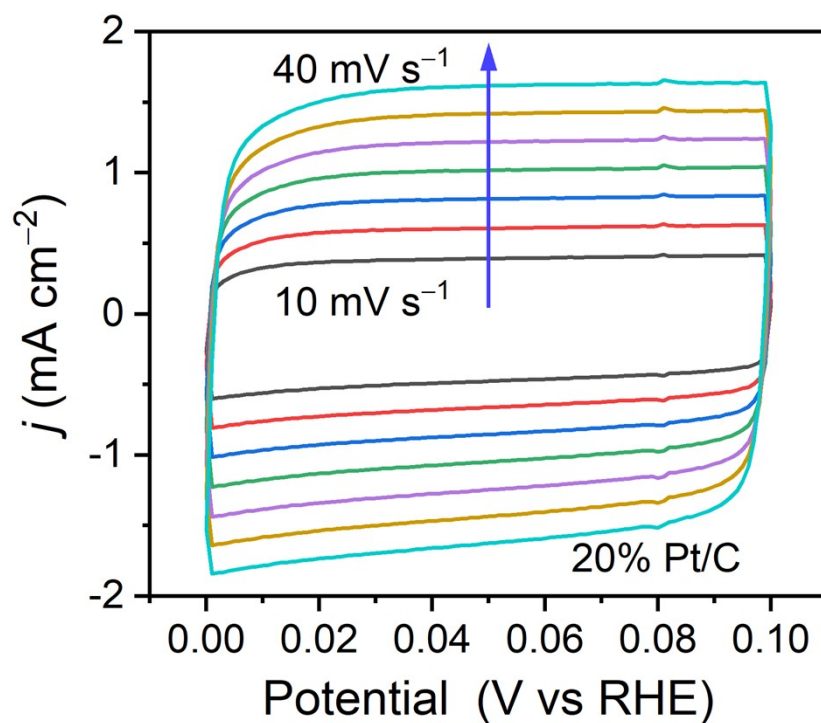

**Fig. S17** CV curves of 20% Pt/C at various scan rates from 10 to  $40 \text{ mV s}^{-1}$  in 0–0.1 V vs RHE.

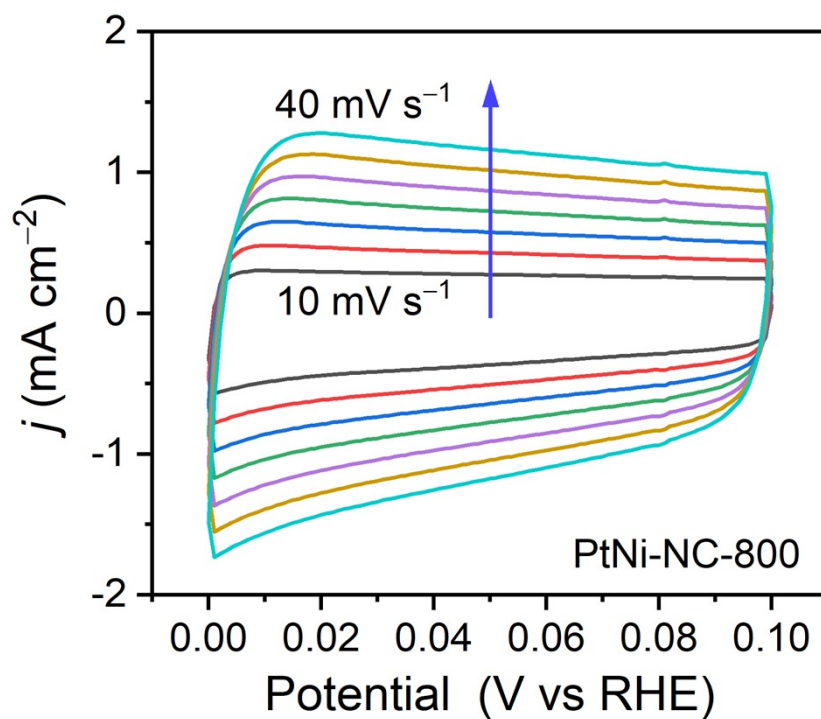

**Fig. S18** CV curves of PtNi-NC-800 at various scan rates from 10 to  $40 \text{ mV s}^{-1}$  in 0–0.1 V vs RHE.



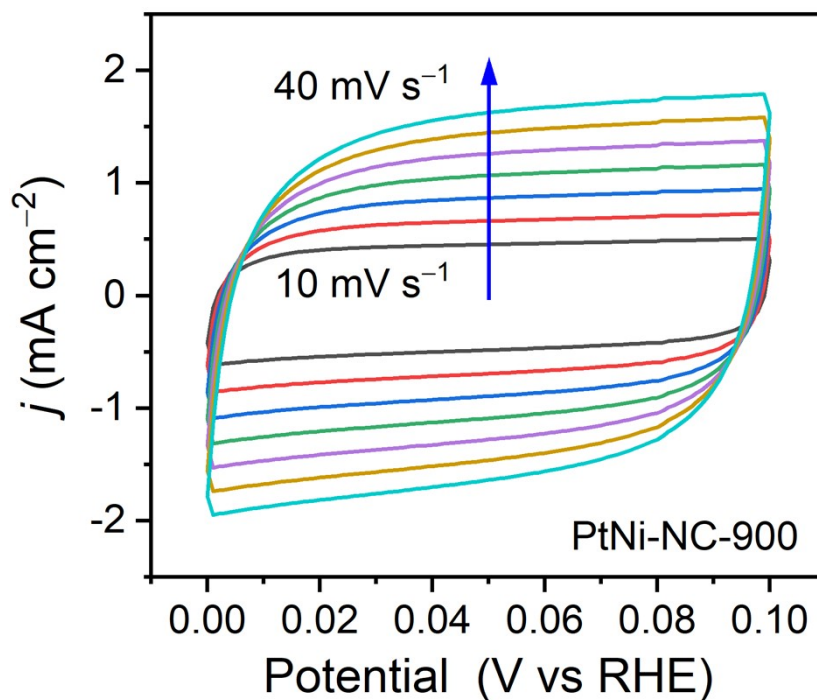

**Fig. S19** CV curves of PtNi-NC-900 at various scan rates from 10 to 40  $\text{mV s}^{-1}$  in 0–0.1 V vs RHE.

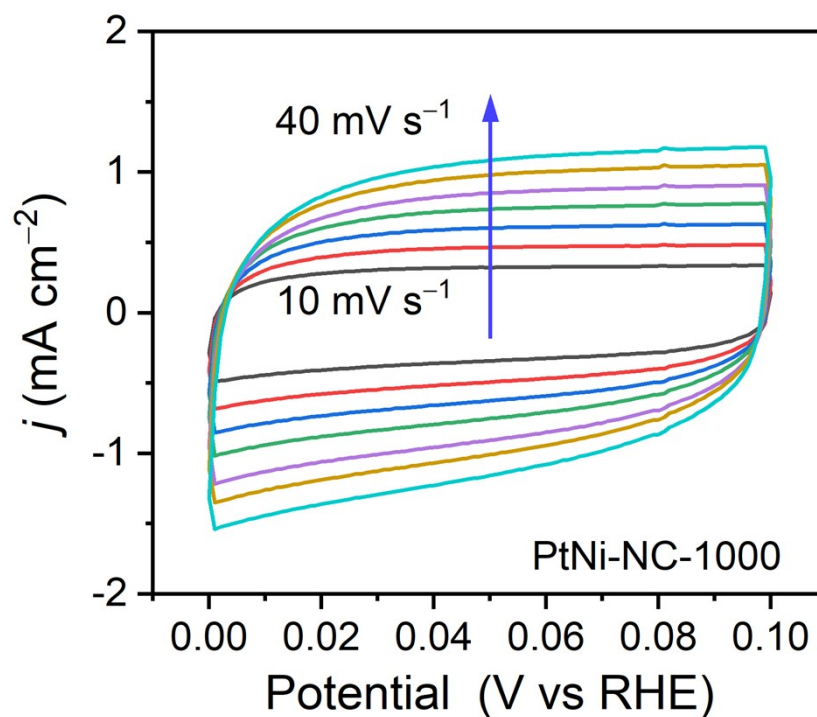

**Fig. S20** CV curves of PtNi-NC-1000 at various scan rates from 10 to 40  $\text{mV s}^{-1}$  in 0–0.1 V vs RHE.

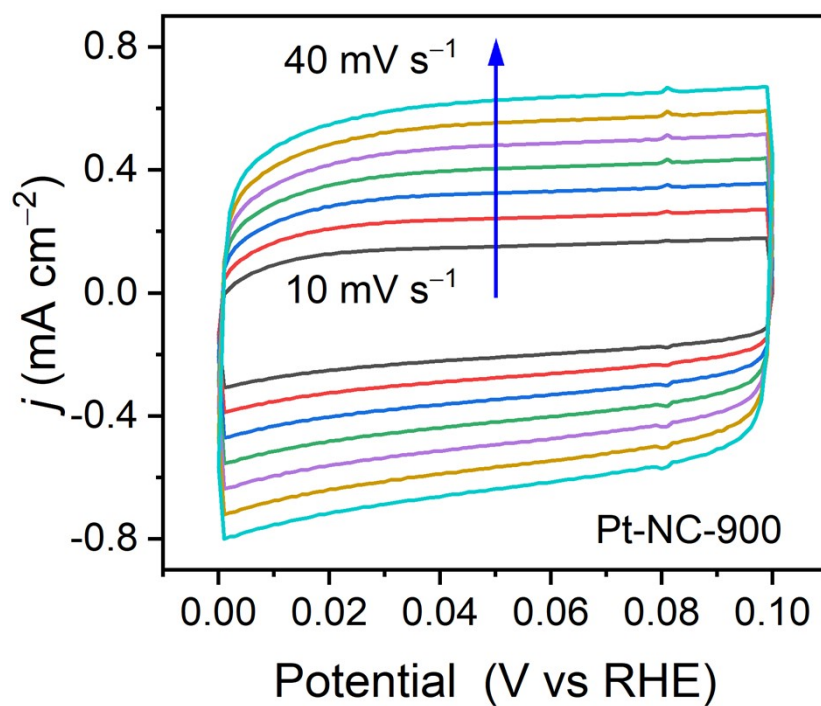

**Fig. S21** CV curves of Pt-NC-900 at various scan rates from 10 to 40  $\text{mV s}^{-1}$  in 0–0.1 V vs RHE.

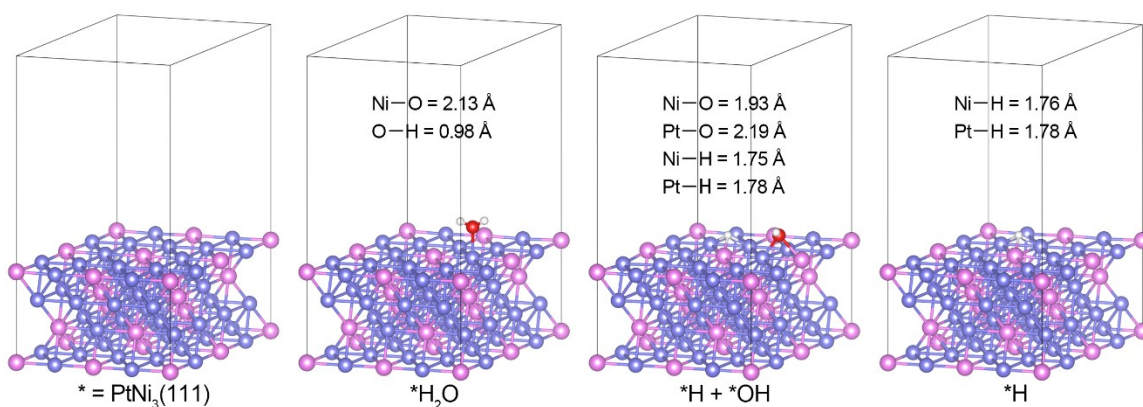

**Fig. S22** Atomic configurations of optimized  $\text{PtNi}_3(111)$  slab and its corresponding alkaline HER intermediates, where magenta, purple, red, and white spheres represent Pt, Ni, O, and H atoms, respectively.

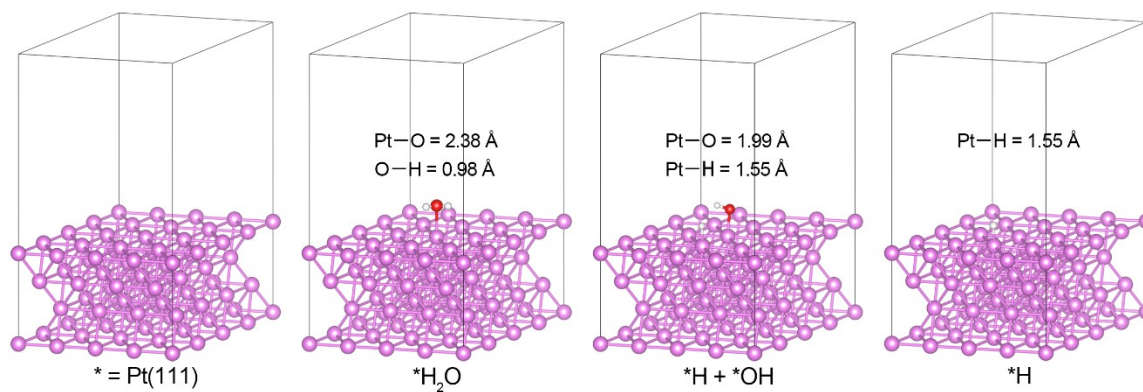

**Fig. S23** Atomic configurations of optimized Pt(111) slab and its corresponding alkaline HER intermediates, where magenta, red, and white spheres represent Pt, O, and H atoms, respectively.

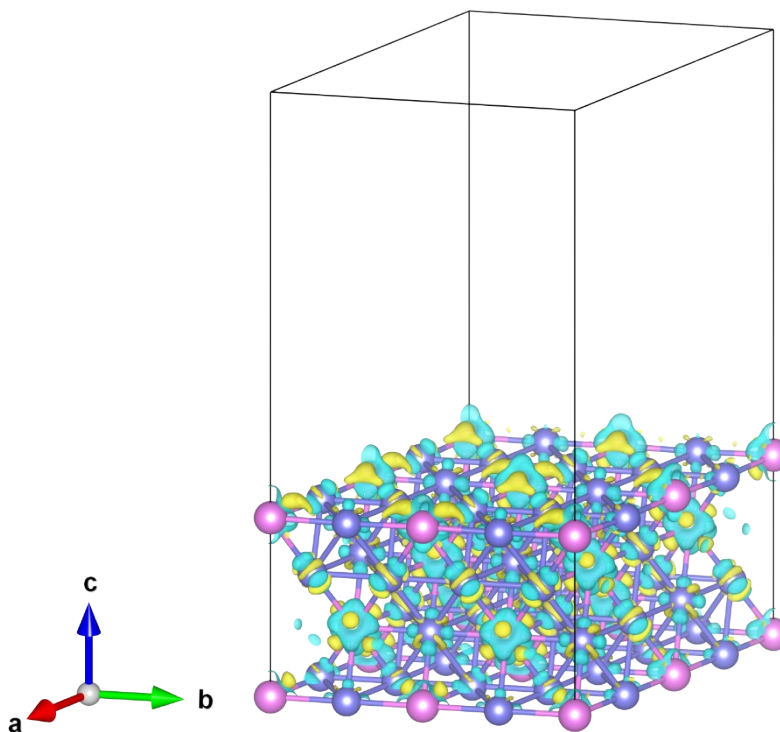

**Fig. S24** Difference charge density of pristine PtNi<sub>3</sub>(111) surface (where cyan areas show an electron density decrease and yellow areas an electron density increase).

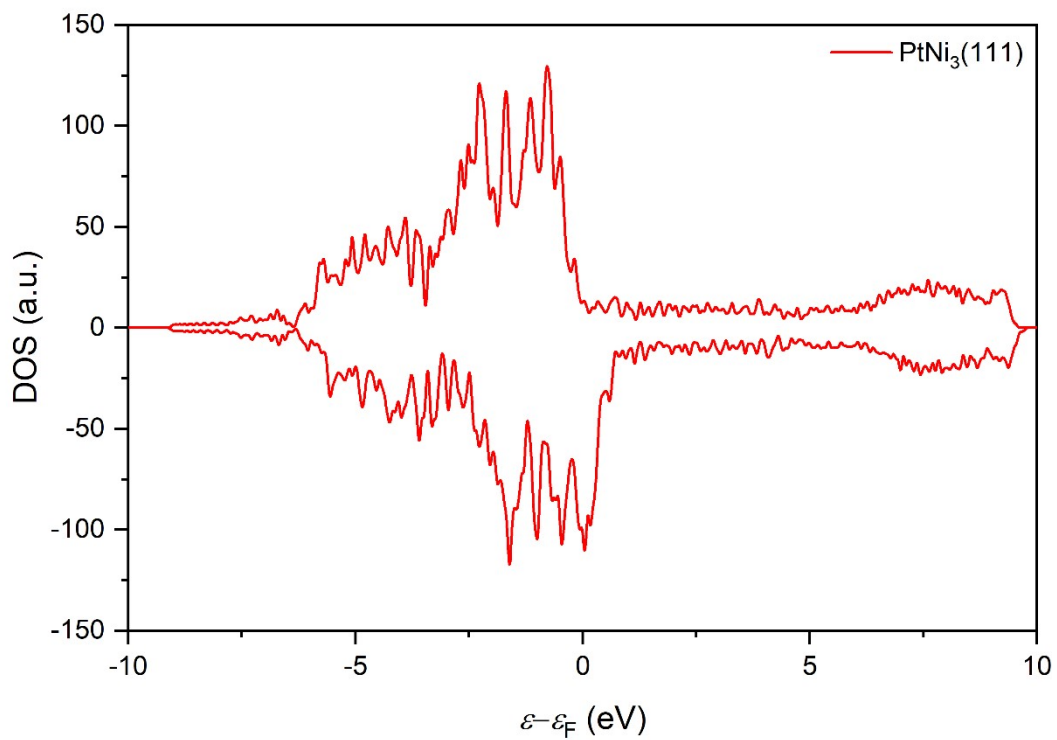

**Fig. S25** Total DOS of PtNi<sub>3</sub>(111).

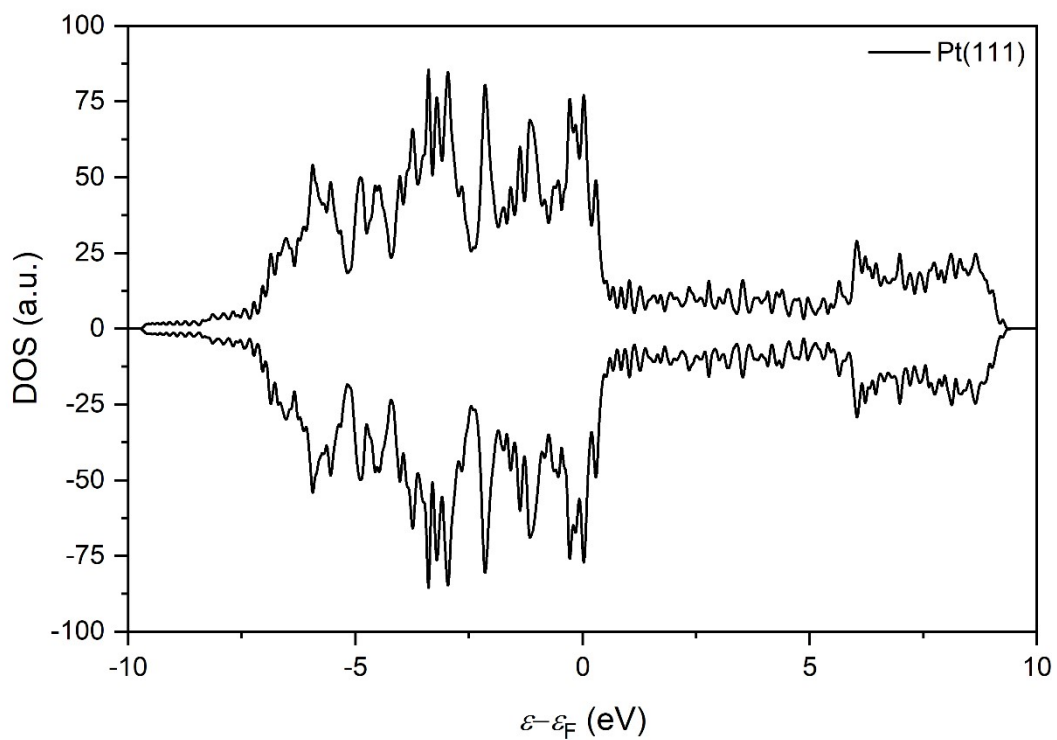

**Fig. S26** Total DOS of Pt(111).

**Table S1** Comparison of the positions of deconvoluted Ni 2p peaks for PtNi-NC-900 and Ni-NC-900

| Sample      | Ni <sup>0</sup> | Ni <sup>2+</sup> 2P <sub>3/2</sub> | Ni <sup>2+</sup> 2P <sub>3/2</sub><br>Sat. | Ni <sup>2+</sup> 2P <sub>1/2</sub><br>(Ni(OH) <sub>2</sub> ) | Ni <sup>2+</sup> 2P <sub>1/2</sub><br>(NiO) | Ni <sup>2+</sup> 2P <sub>1/2</sub><br>Sat. |
|-------------|-----------------|------------------------------------|--------------------------------------------|--------------------------------------------------------------|---------------------------------------------|--------------------------------------------|
| PtNi-NC-900 | 854.2 eV        | 856.3 eV                           | 861.5 eV                                   | 874.3 eV                                                     | 872.1 eV                                    | 880.2 eV                                   |
| Ni-NC-900   | 854.4 eV        | 856.4 eV                           | 861.7 eV                                   | 874.5 eV                                                     | 872.2 eV                                    | 880.4 eV                                   |

**Table S2** Comparison of the HER activities of PtNi-NC-900 and other recently reported Pt and Ni based electrocatalysts in 1.0 M KOH

| Catalyst                                     | Mass activity                                      | Current Density   | Overpotential (mV)                    | Tafel Slope (mV dec <sup>-1</sup> ) | Ref.      |
|----------------------------------------------|----------------------------------------------------|-------------------|---------------------------------------|-------------------------------------|-----------|
| PtNi-NC-900                                  | 3.78 A mg <sub>Pt</sub> <sup>-1</sup><br>(@50 mV)  | 31.7<br>(-0.07 V) | 37.4 mV<br>(@10 Am cm <sup>-2</sup> ) | 43.2                                | This work |
| PtNi-O/C                                     | 7.23 A mg <sub>Pt</sub> <sup>-1</sup><br>(@70 mV)  | 14.8<br>(-0.07 V) | 39.8 mV<br>(@10 Am cm <sup>-2</sup> ) | 78.8                                | 10        |
| PtNWs/SL-Ni(OH) <sub>2</sub>                 | 0.679 A mg <sub>Pt</sub> <sup>-1</sup><br>(@70 mV) | 10.9<br>(-0.07 V) | 70 mV<br>(@10 Am cm <sup>-2</sup> )   | –                                   | 11        |
| Pt <sub>2</sub> Ni <sub>3</sub> -P NWs       | –                                                  | –                 | 44 mV<br>(@10 Am cm <sup>-2</sup> )   | 66                                  | 12        |
| Pt <sub>2</sub> Ni <sub>3</sub> -NWs         | –                                                  | –                 | 51 mV<br>(@10 Am cm <sup>-2</sup> )   | 85                                  | 12        |
| Pt <sub>3</sub> Ni <sub>3</sub> NWs/C-air    | –                                                  | 39.7<br>(-0.07 V) | 40 mV<br>(@10 Am cm <sup>-2</sup> )   | –                                   | 13        |
| D-PtNi/C                                     | 1.03 A mg <sub>Pt</sub> <sup>-1</sup><br>(@70 mV)  | –                 | 39.7 mV<br>(@10 Am cm <sup>-2</sup> ) | 55                                  | 14        |
| 20 wt% Pt/Ni(HCO <sub>3</sub> ) <sub>2</sub> | 1.77 A mg <sub>Pt</sub> <sup>-1</sup><br>(@100 mV) | –                 | 44<br>(@10 Am cm <sup>-2</sup> )      | 45                                  | 15        |
| 38 wt% Pt NWs/SL-Ni(OH) <sub>2</sub>         | 0.68 A mg <sub>Pt</sub> <sup>-1</sup><br>(@70 mV)  | 2.48<br>(-0.07 V) | 85.5<br>(@4 Am cm <sup>-2</sup> )     | –                                   | 16        |

## References

- 1 G. Kresse and J. Hafner, *Phys. Rev. B*, 1993, **47**, 558–561.
- 2 G. Kresse and J. Hafner, *Phys. Rev. B*, 1994, **49**, 14251–14269.
- 3 X. Liu, Y. Jiao, Y. Zheng, K. Davey and S.-Z. Qiao, *J. Mater. Chem. A*, 2019, **7**, 3648–3654.
- 4 Y.-L. Wu, X. Li, Y.-S. Wei, Z. Fu, W. Wei, X.-T. Wu, Q.-L. Zhu and Q. Xu, *Adv. Mater.*, 2021, **33**, 2006965.
- 5 P. E. Blöchl, *Phys. Rev. B*, 1994, **50**, 17953–17979.
- 6 G. Kresse and D. Joubert, *Phys. Rev. B*, 1999, **59**, 1758–1775.
- 7 J. P. Perdew, K. Burke and M. Ernzerhof, *Phys. Rev. Lett.*, 1996, **77**, 3865–3868.
- 8 S. Grimme, *J. Comput. Chem.*, 2006, **27**, 1787–1799.
- 9 J. K. Nørskov, J. Rossmeisl, A. Logadottir, L. Lindqvist, J. R. Kitchin, T. Bligaard and H. Jónsson, *J. Phys. Chem. B*, 2004, **108**, 17886–17892.
- 10 Z. Zhao, H. Liu, W. Gao, W. Xue, Z. Liu, J. Huang, X. Pan and Y. Huang, *J. Am. Chem. Soc.*, 2018, **140**, 9046-9050.
- 11 Z. Cao, Q. Chen, J. Zhang, H. Li, Y. Jiang, S. Shen, G. Fu, B. A. Lu, Z. Xie and L. Zheng, *Nat. commun.*, 2017, **8**, 15131.
- 12 P. Wang, Q. Shao, J. Guo, L. Bu and X. Huang, *Chem. Mater.*, 2020, **32**, 3144-3149.
- 13 P. Wang, K. Jiang, G. Wang, J. Yao and X. Huang, *Angew. Chem. Int. Ed.*, 2016, **55**, 12859-12863.
- 14 H. Chen, G. Wang, T. Gao, Y. Chen, H. Liao, X. Guo, H. Li, R. Liu, M. Dou, S. Nan and Q. He, *J. Phys. Chem. C*, 2020, **124**, 5036-5045.
- 15 M. Lao, K. Rui, G. Zhao, P. Cui, X. Zheng, S. X. Dou and W. Sun, *Angew. Chem. Int. Ed.*, 2019, **58**, 5432-5437.
- 16 H. Yin, S. Zhao, K. Zhao, A. Muqsit, H. Tang, L. Chang, H. Zhao, Y. Gao and Z. Tang, *Nat. Commun.*, 2015, **6**, 6430.
